# Supplementary material for: α-MnO2 Nanowires as Potential Scaffolds for a High-Performance Formaldehyde Gas Sensor Device
Source: MDPI journal article supplement (doi:10.3390/coatings11070860), 2021-07-17
Supplement: s1 [file s1]

# Supplementary Materials: $\alpha$ -MnO<sub>2</sub> Nanowires as Potential Scaffolds for a High-Performance Formaldehyde Gas Sensor Device

Ahmad Umar <sup>1,2,\*</sup>, Ahmed A. Ibrahim <sup>1,2</sup>, Rajesh Kumar <sup>3</sup>, Hassan Algadi <sup>2,4</sup>, Hasan Albargi <sup>2,5</sup>, Faheem Ahmad <sup>6</sup>, Wen Zeng <sup>7</sup>, and M. Shaheer Akhtar <sup>8,\*</sup>

<sup>1</sup> Department of Chemistry, Faculty of Science and Arts, Najran University, Najran 11001, Kingdom of Saudi Arabia; ahmedragal@yahoo.com

<sup>2</sup> Promising Centre for Sensors and Electronic Devices (PCSED), Najran University, Najran 11001, Kingdom of Saudi Arabia; hassan.algadi@gmail.com (H.A.); albargih@yahoo.com (H.A.)

<sup>3</sup> Department of Chemistry, Jagdish Chandra DAV College Dasuya, Punjab 144205, India; rk.ash2k7@gmail.com

<sup>4</sup> Department of Electrical Engineering, Najran University, Najran 11001, Kingdom of Saudi Arabia

<sup>5</sup> Department of Physics, Faculty of Science and Arts, Najran University, Najran 11001, Kingdom of Saudi Arabia

<sup>6</sup> Department of Physics, College of Science, King Faisal University, Hofuf 31982, Kingdom of Saudi Arabia; faheem030@gmail.com

<sup>7</sup> College of Materials Science and Engineering, Chongqing University, Chongqing 400044, China; wenzeng@cqu.edu.cn

<sup>8</sup> New & Renewable Energy Material Development Center (NewREC), Jeonbuk National University, Jeonbuk 56332, Korea

\* Correspondence: umahmad@nu.edu.sa or ahmadumar786@gmail.com (A.U.); shaheerakhtar@jbnu.ac.kr (M.S.A.)

**Citation:** Umar, A.; Ibrahim, A.A.; Kumar, R.; Algadi, H.; Albargi, H.; Ahmad, F.; Zeng, W.; Akhtar, M.S.  $\alpha$ -MnO<sub>2</sub> Nanowires as Potential Scaffolds for a High-Performance Formaldehyde Gas Sensor Device. *Coatings* **2021**, *11*, 860. <https://doi.org/10.3390/coatings11070860>

Academic Editor: Alessandro Patelli

Received: 20 June 2021

Accepted: 12 July 2021

Published: 17 July 2021

**Publisher's Note:** MDPI stays neutral with regard to jurisdictional claims in published maps and institutional affiliations.

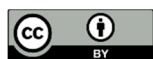

**Copyright:** © 2021 by the authors. Licensee MDPI, Basel, Switzerland. This article is an open access article distributed under the terms and conditions of the Creative Commons Attribution (CC BY) license (<http://creativecommons.org/licenses/by/4.0/>).

## Supporting Information

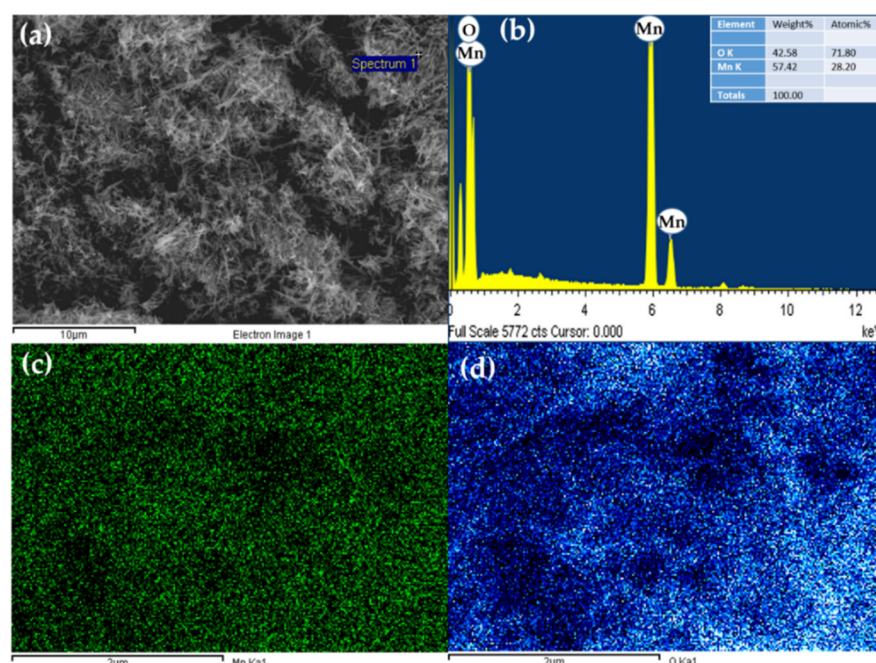

**Figure S1.** (a) Selected area electronic FESEM image, (b) EDS spectrum (Inset: Atomic and weight percentages of Mn and O in sample) and (c,d) Elemental mapping images for Mn and O, respectively for  $\alpha$ -MnO<sub>2</sub> nanowires.

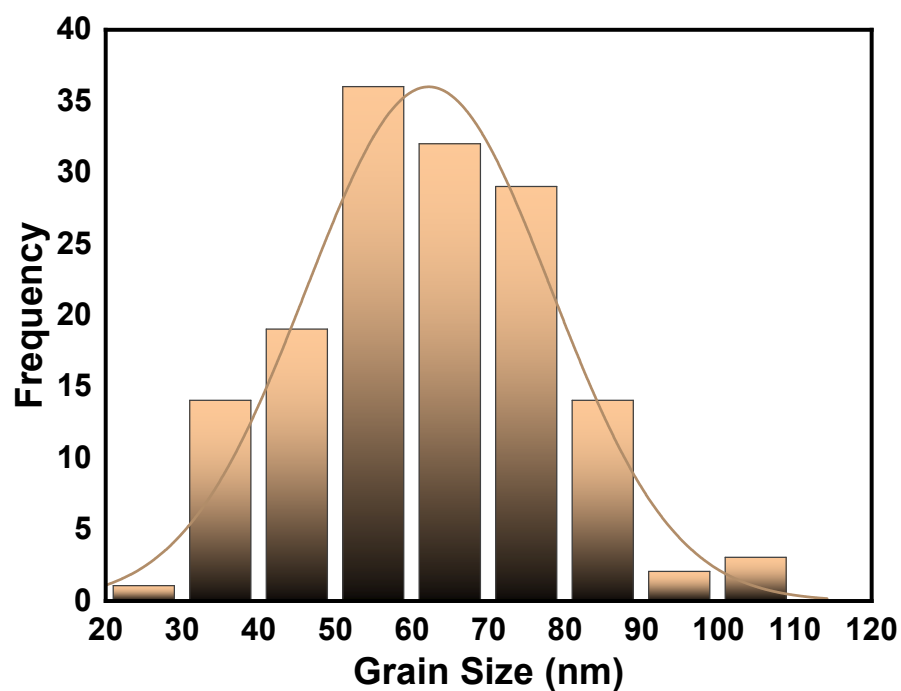

**Figure S2.** Diameter size distribution for the  $\alpha$ -MnO<sub>2</sub> nanowires.

**Table S1.** Descriptive Statistics Data for measuring diameter of the  $\alpha$ -MnO<sub>2</sub> nanowires.

| N total | Mean  | Standard Deviation | Sum     | Minimum | Median | Maximum |
|---------|-------|--------------------|---------|---------|--------|---------|
| 150     | 62.19 | 15.99              | 9328.20 | 24.70   | 61.02  | 109.65  |
